# Supplementary material for: Endocytosis-mediated entry of a caterpillar effector into plants is countered by Jasmonate
Source: PubMed Central journal article supplement (PMC10582130; doi:10.1038/s41467-023-42226-1), 2023-10-17
Supplement: 41467_2023_42226_MOESM1_ESM.pdf [file 41467_2023_42226_MOESM1_ESM.pdf]

1 **Supporting Information for**

2 **Endocytosis-mediated entry of a caterpillar effector into plants is countered by**  
3 **Jasmonate**

4 Zi-Wei Yan<sup>1,2,7</sup>, Fang-Yan Chen<sup>1,2,3,7</sup>, Xian Zhang<sup>1,2</sup>, Wen-Juan Cai<sup>4</sup>, Chun-Yu Chen<sup>1,2</sup>,  
5 Jie Liu<sup>1,5</sup>, Man-Ni Wu<sup>1,2</sup>, Ning-Jing Liu<sup>3</sup>, Bin Ma<sup>3</sup>, Mu-Yang Wang<sup>1</sup>, Dai-Yin Chao<sup>3</sup>,  
6 Cai-Ji Gao<sup>6</sup> and Ying-Bo Mao<sup>1,\*</sup>

7 <sup>1</sup> *CAS Key Laboratory of Insect Developmental and Evolutionary Biology, CAS*  
8 *Center for Excellence in Molecular Plant Sciences (CEMPS), Institute of Plant*  
9 *Physiology and Ecology (SIPPE), Chinese Academy of Sciences (CAS), Shanghai,*  
10 *China*

11 <sup>2</sup> *University of CAS, Shanghai, China*

12 <sup>3</sup> *National Key Laboratory of Plant Molecular Genetics, CEMPS/SIPPE, CAS,*  
13 *Shanghai, China*

14 <sup>4</sup> *Core Facility Center of CEMPS/SIPPE, CAS, Shanghai, China*

15 <sup>5</sup> *Shanghai Key Laboratory of Plant Molecular Sciences, College of Life Sciences,*  
16 *Shanghai Normal University, Shanghai, China*

17 <sup>6</sup> *Guangdong Provincial Key Laboratory of Biotechnology for Plant Development,*  
18 *School of Life Sciences, South China Normal University (SCNU), Guangzhou, China*

19 <sup>7</sup> *These authors contributed equally: Zi-Wei Yan, Fang-Yan Chen.*

20 *\*Correspondence: Ying-Bo Mao, email: ybmao@cemps.ac.cn*

21 **Supplementary Figures**

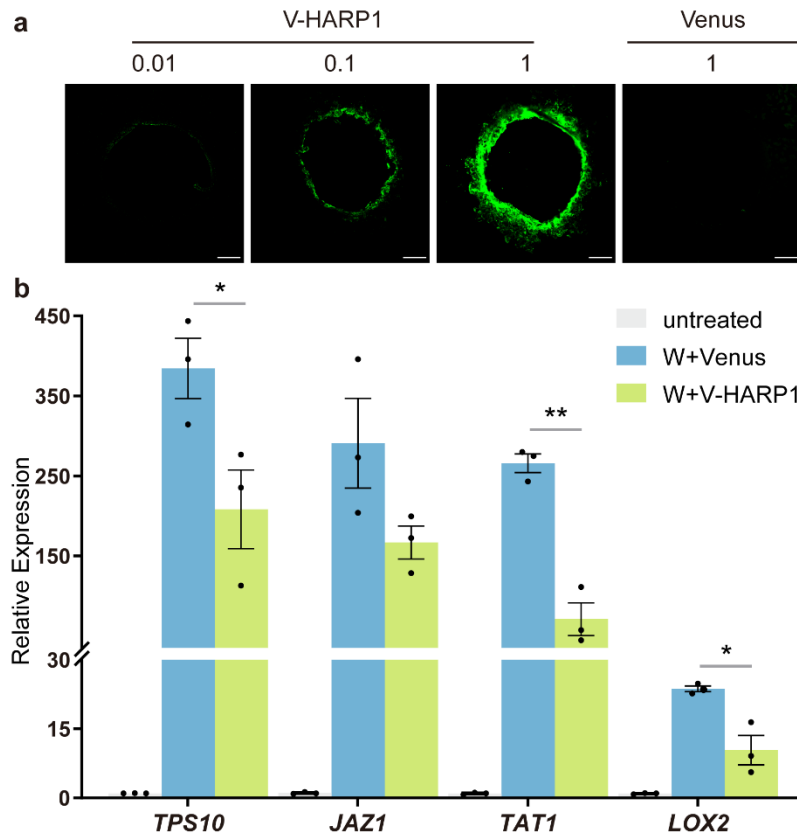

22

23 **Supplementary Figure 1. Weakened plant wounding response by V-HARP1**  
 24 **application.** (a) Confocal microscopy observation of V-HARP1 around the wounding  
 25 site of *Arabidopsis* leaves. The wounded leaves were incubated with V-HARP1 (0.01,  
 26 0.1 and 1 mg/ml) and Venus (1 mg/ml) for four hours, respectively. Scale bar, 200  $\mu$ m.  
 27 (b) *Arabidopsis* leaves were wounded and painted with 1 mg/ml Venus (W+Venus,  
 28 blue indicated) or V-HARP1 (W+V-HARP1, green indicated) on the wounding sites  
 29 quickly. The expressions of the indicated genes were detected 4 hours post treatments  
 30 by qRT-PCR. The gene expressions in the unwounded plants (untreated, gray  
 31 indicated) were set to 1. Data are means  $\pm$  SEM ( $n = 3$  biological replicates) and  
 32 analyzed by two-sided Student's  $t$  test ( $*P < 0.05$ ,  $**P < 0.01$ ). Source data are  
 33 provided as a Source Data file.

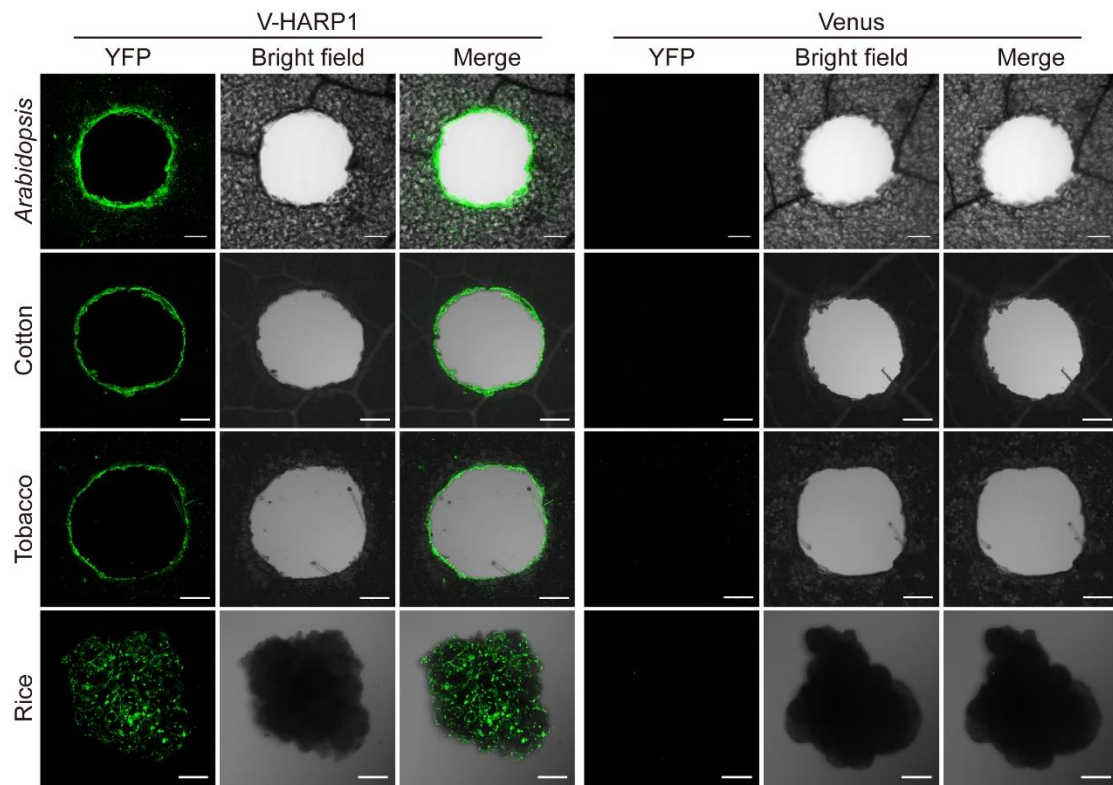

34

35 **Supplementary Figure 2. Entry of V-HARP1 into *Arabidopsis*, cotton, tobacco,**  
 36 **and rice callus.** The wounded *Arabidopsis*, cotton and tobacco leaves as well as rice  
 37 callus were incubated with V-HARP1 or Venus, respectively and then washed with  
 38 PBS containing 0.08% BSA for 6 times. Confocal microscopy was used for detection.  
 39 YFP indicates the fluorescence signal of Venus and V-HARP1. Scale bar, 200  $\mu\text{m}$ .

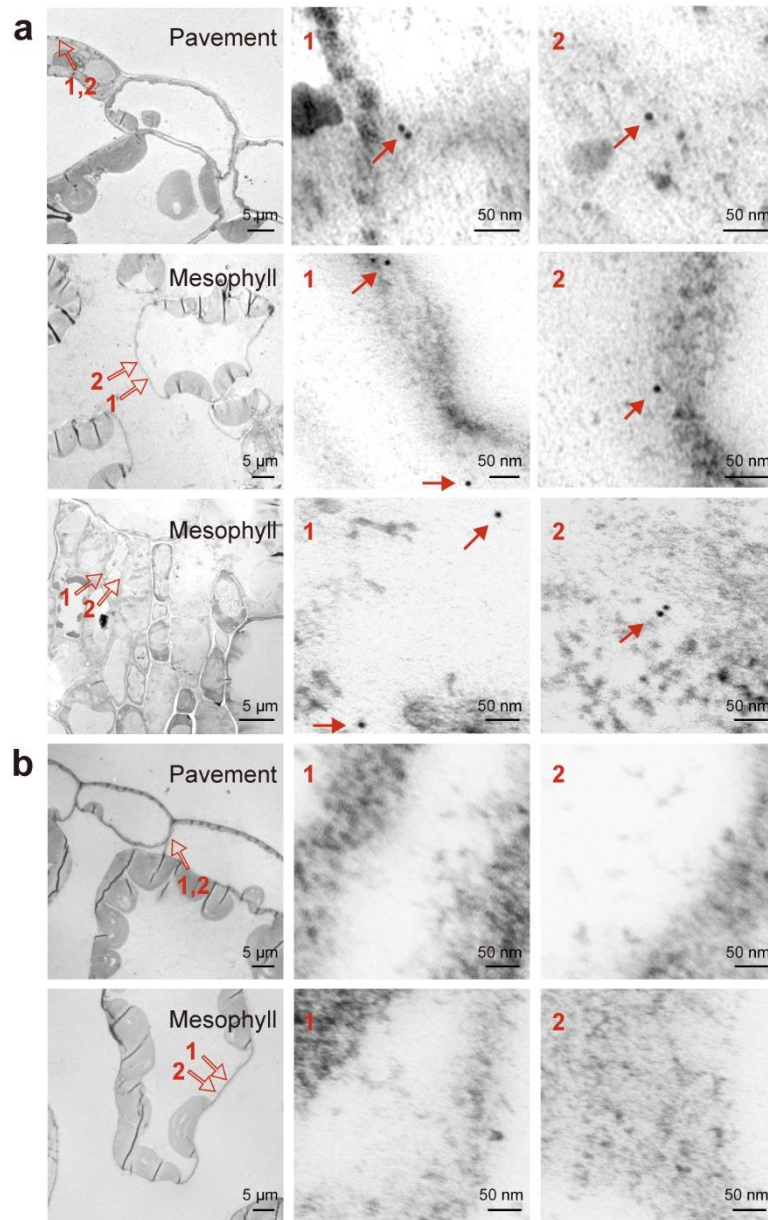

40

41 **Supplementary Figure 3. It was V-HARP1 not Venus that was found in**  
 42 **pavement and mesophyll cells under transmission electron microscope (TEM)**  
 43 **observation.** Ultrathin sections from V-HARP1 (a) and Venus (b) treated  
 44 *Arabidopsis* leaves were immune-gold labeled with anti-GFP antibody. The enlarged  
 45 view of the hollow arrow indicated regions (1 and 2) were shown independently. The  
 46 solid arrows indicate the immune-gold labeled V-HARP1. Scale bars were indicated  
 47 in each image.

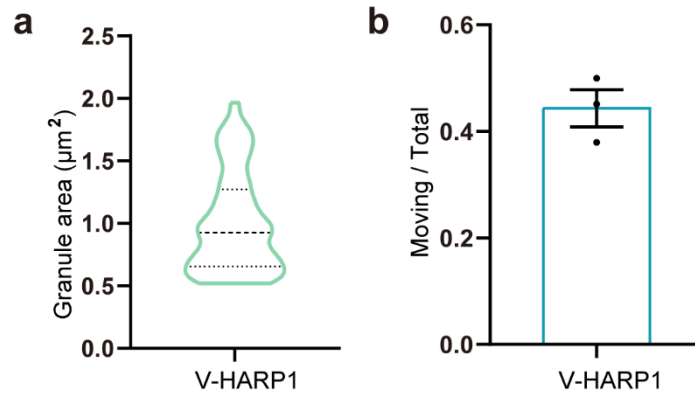

48

49 **Supplementary Figure 4. Quantification of moving V-HARP1 granules.** (a) Size  
50 quantification of V-HARP1 granules. The areas of about 108 granules from six  
51 independent sights were calculated in ImageJ. Data are means  $\pm$  SD ( $n = 108$ ). (b)  
52 The ratio of moving to total V-HARP1 granules. The moving V-HARP1 was tracked  
53 and counted by Olympus cellSens software. Three independent sights with total of  
54 119 V-HARP1 granules were used for calculation. Data are means  $\pm$  SEM ( $n = 3$   
55 biological replicates). Source data are provided as a Source Data file.

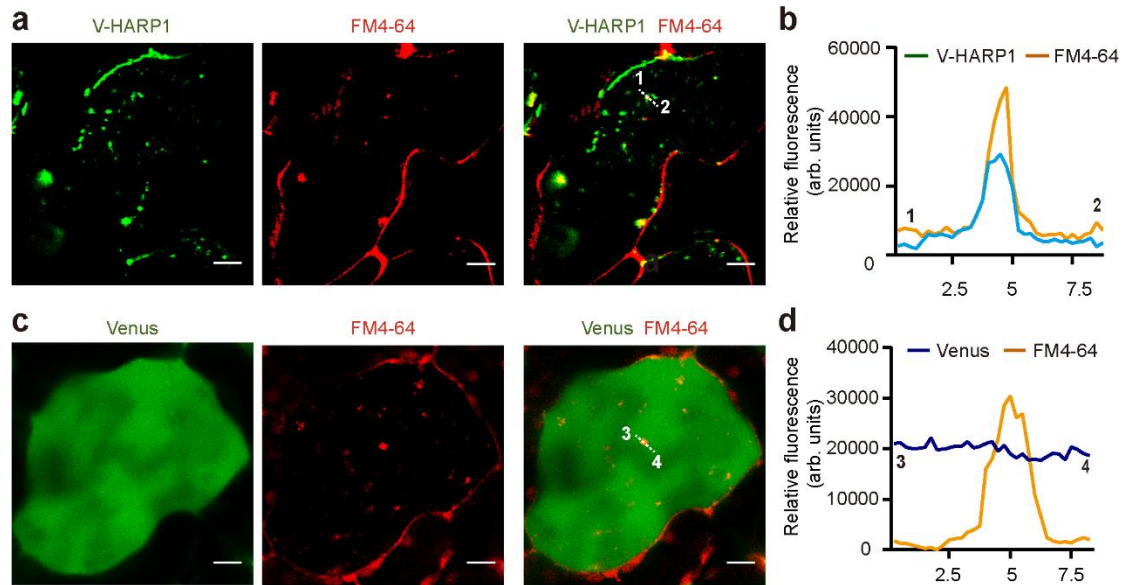

56

57 **Supplementary Figure 5. V-HARP1 not Venus was observed as granules in plant**  
 58 **leaves.** *Arabidopsis* leaves were injected with V-HARP1 and Venus at the  
 59 concentration of 0.2  $\mu\text{g/ml}$ , respectively. And four hours post injection, the leaves  
 60 were stained with FM4-64 for 30 min to mark membrane and endosomes. Scale bar,  
 61 10  $\mu\text{m}$ . **(a)** Injected V-HARP1 in *Arabidopsis* leaves. **(b)** Fluorescence intensity (in  
 62 arbitrary units, arb. units) of the cross sections [dotted line in **(a)**]. Blue and orange  
 63 lines indicate V-HARP1 and FM4-64 fluorescence signals, respectively. **(c)** Injected  
 64 Venus in *Arabidopsis* leaves. **(d)** Fluorescence intensity (in arbitrary units, arb. units)  
 65 of the cross sections [dotted line in **(c)**]. Blue and orange lines indicate Venus and  
 66 FM4-64 fluorescence signals, respectively.

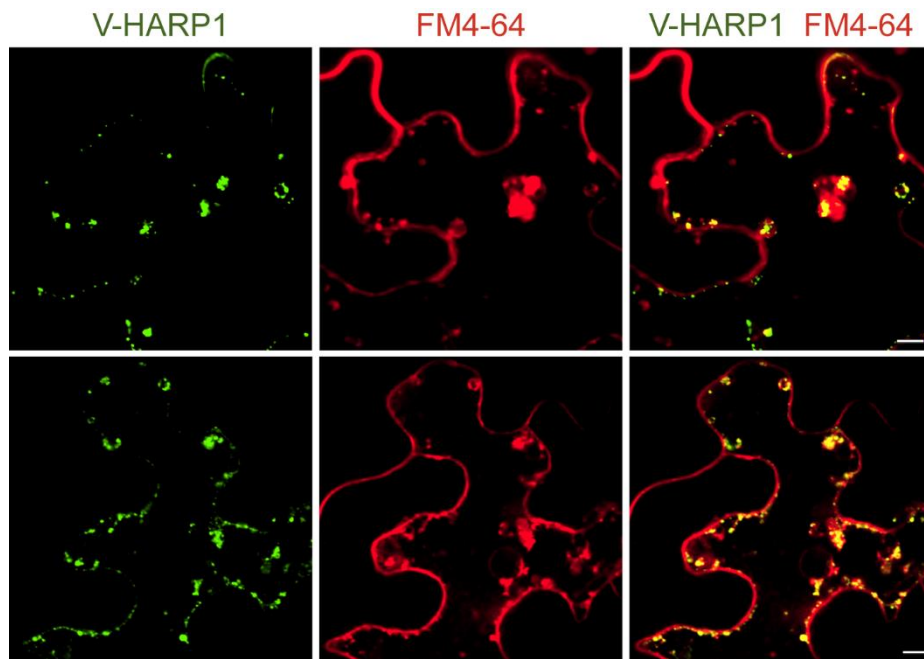

67

68 **Supplementary Figure 6. V-HARP1 locates in internalized endosomes.** The  
69 wounded *Arabidopsis* leaves were incubated with V-HARP1 and further stained with  
70 FM4-64 to trace internalized endosomes. Scale bar, 5  $\mu\text{m}$ .

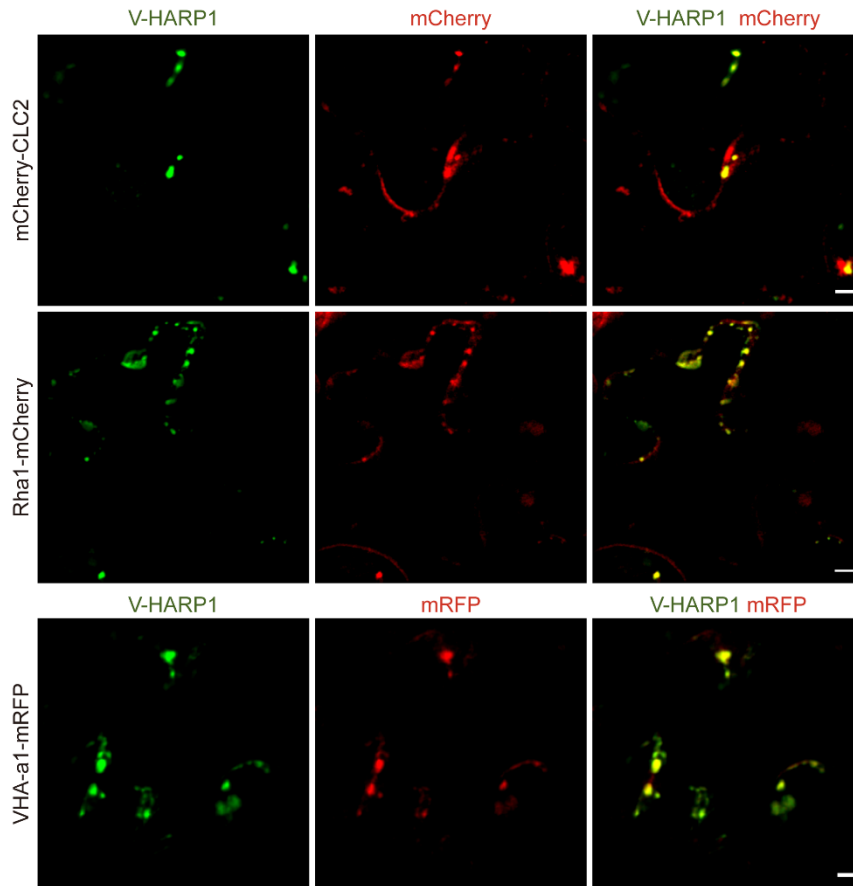

71

72 **Supplementary Figure 7. V-HARP1 colocalizes with mCherry-CLC2, Rha1-**  
 73 **mCherry, and VHA-a1-mRFP marked endosomes.** The wounded leaves of  
 74 indicated *Arabidopsis* plants were incubated with V-HARP1, respectively. mCherry-  
 75 CLC2 and VHA-a1-mRFP indicate clathrin-coated vesicles and secretory vesicles of  
 76 early endosomes, respectively. Rha1-mCherry indicates prevacuolar  
 77 compartment/multivesicular body/late endosomes. Scale bar, 5  $\mu$ m.



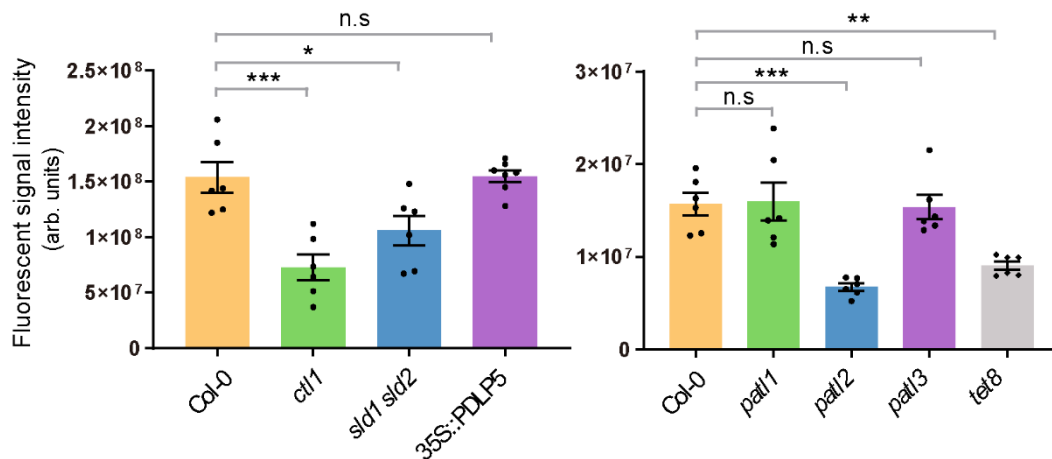

79

80 **Supplementary Figure 8. Quantifications of V-HARP1 signals in Fig. 3a and 3b.**81 The indicated *Arabidopsis* leaves were wounded and incubated with V-HARP1. 6  
82 random sights were selected for calculation. Integrated intensity of fluorescence (in

83 arbitrary units, arb. units) was measured in the whole sight selected. Data are means ±

84 SEM ( $n = 6$  biological replicates) and analyzed by one-way ANOVA with two-sided85 Dunnett's post hoc test (n.s: no significance,  $*p < 0.05$ ,  $**p < 0.01$ ,  $***p < 0.001$ ).

86 Source data are provided as a Source Data file.

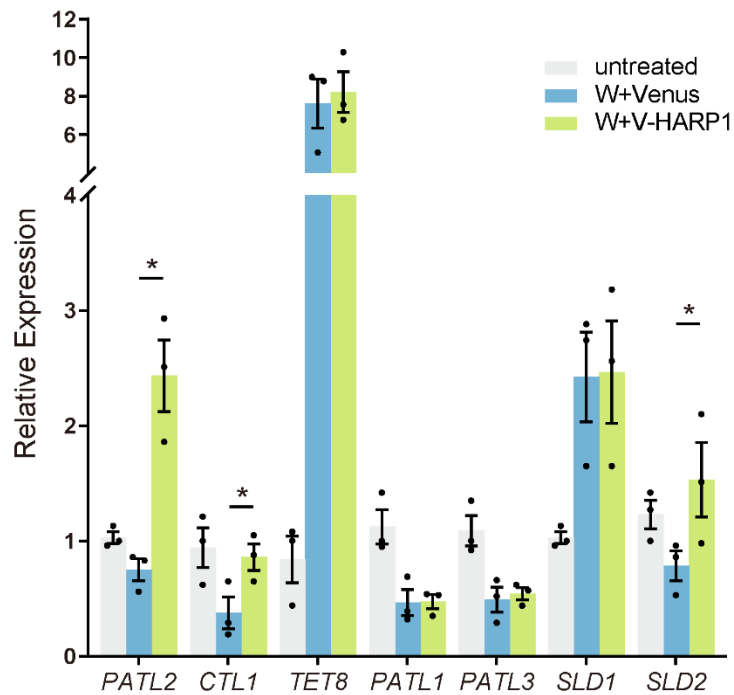

88

89 **Supplementary Figure 9. V-HARP1 induces the expressions of *PATL2*, *CTL1* and**  
 90 ***SLD2* in wounding response.** *Arabidopsis* leaves were wounded and immediately  
 91 painted with 1 mg/ml Venus (W+Venus, blue indicated) or V-HARP1 (W+V-HARP1,  
 92 green indicated) on the wounding sites. Gene expressions four hours post treatments  
 93 were detected by qRT-PCR. The expressions in the untreated (gray indicated) plants  
 94 were set to 1. Data are means  $\pm$  SEM ( $n = 3$  biological replicates ) and analyzed by  
 95 two-sided Student's  $t$  test ( $*P < 0.05$ ). Source data are provided as a Source Data file.

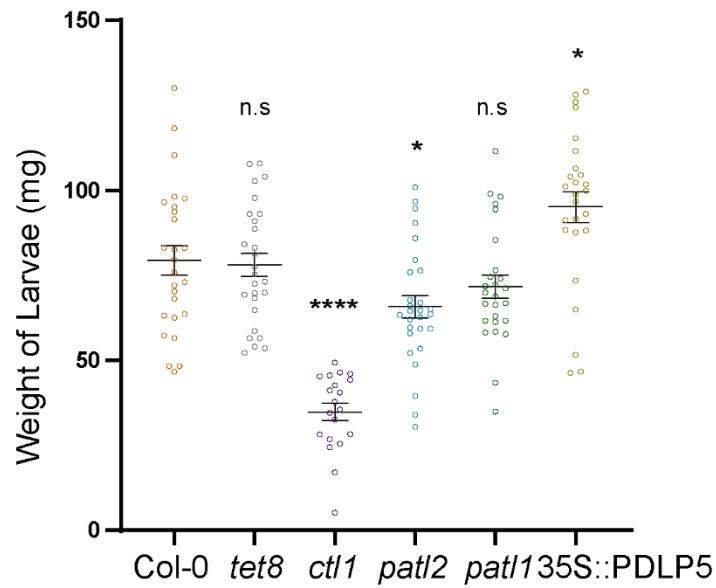

96

97 **Supplementary Figure 10. The growth of *H. armigera* larvae fed on *ct11* or *pat12***  
 98 **plants were inhibited.** The synchronous third-instar larvae were fed on wild type  
 99 (Col-0) and the indicated mutants for 4 days and subsequently weighted. Data are  
 100 means  $\pm$  SEM ( $n = 20-28$ ) and analyzed by two-sided Student's  $t$  test (n.s: no  
 101 significance,  $*p < 0.05$ ,  $****p < 0.0001$ ). Source data are provided as a Source Data  
 102 file.

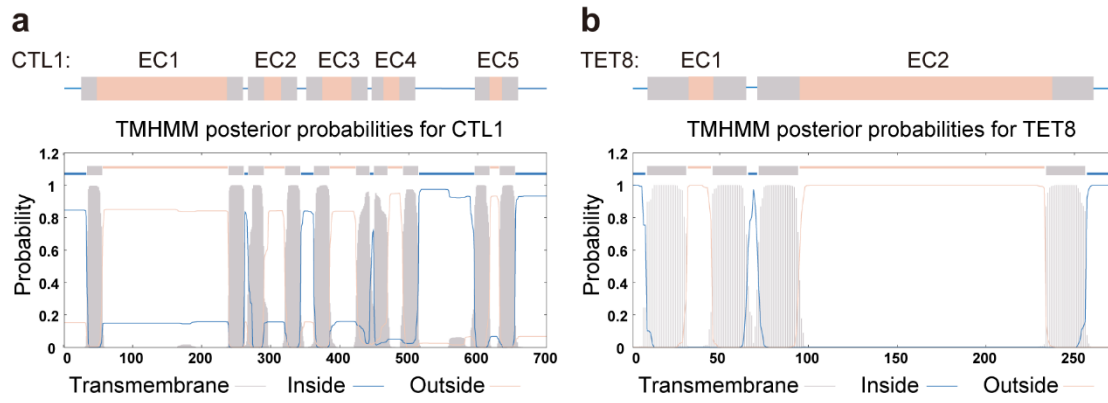

103

104 **Supplementary Figure 11. Predicted extracellular loops (ECs, pink) and**  
 105 **transmembrane helices (gray) of CTL1 and TET8.** The transmembrane helices in  
 106 CTL1 **(a)** and TET8 **(b)** were predicted by TMHMM  
 107 (<http://www.cbs.dtu.dk/services/TMHMM/>).

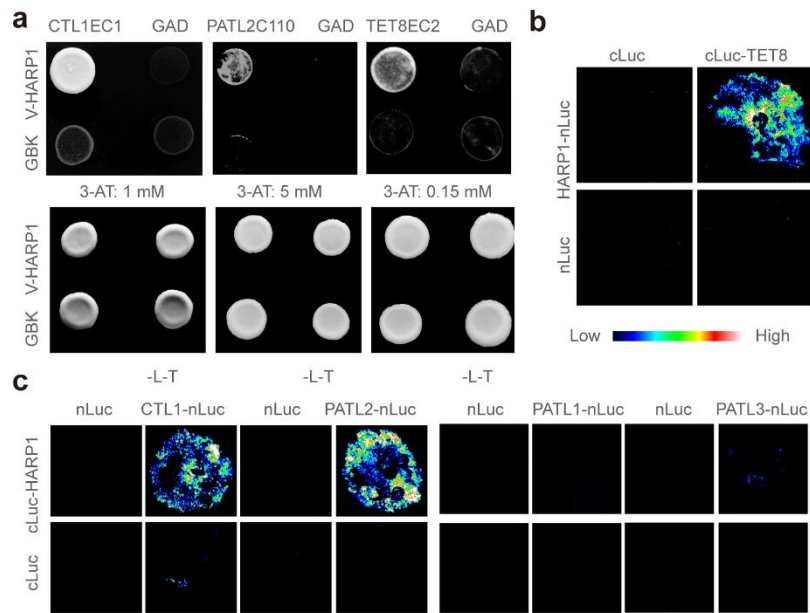

109

110 **Supplementary Figure 12. HARP1 interacts with CTL1, PATL2 and TET8.** (a)  
 111 Yeast two-hybrid assays of CTL1EC1, PATL2C110 and TET8EC2 interaction with  
 112 V-HARP1. V-HARP1 was fused to GAL4 DNA-binding domain (BD), CTL1EC1,  
 113 PATL2C110 and TET8EC2 were fused to GAL4 activation domain (AD),  
 114 respectively. To examine the interaction with CTL1EC1 and TET8EC2, yeast cells  
 115 were grown on medium (-L-T-H) with 1 mM and 0.15 mM 3-AT, respectively. To  
 116 examine the interaction with PATL2C110, yeast cells were grown on medium (-A-L-  
 117 T-H) with 5 mM 3-AT. (b-c) Detection of HARP1 interaction with TET8 (b) as well  
 118 as with PATLs (PATL1, 2, 3) and CTL1 (c) by BiLC assay. The colors ranged from  
 119 white, red, green to blue indicate a strong to weak interaction. (b) TET8 was fused to  
 120 the carboxyl-terminal half of LUCIFERASE (cLuc) and HARP1 was fused to the  
 121 amino-terminal half of LUCIFERASE (nLuc). (c) CTL1, PATL1, PATL2 and PATL3  
 122 were fused to nLuc and HARP1 was fused to cLuc.

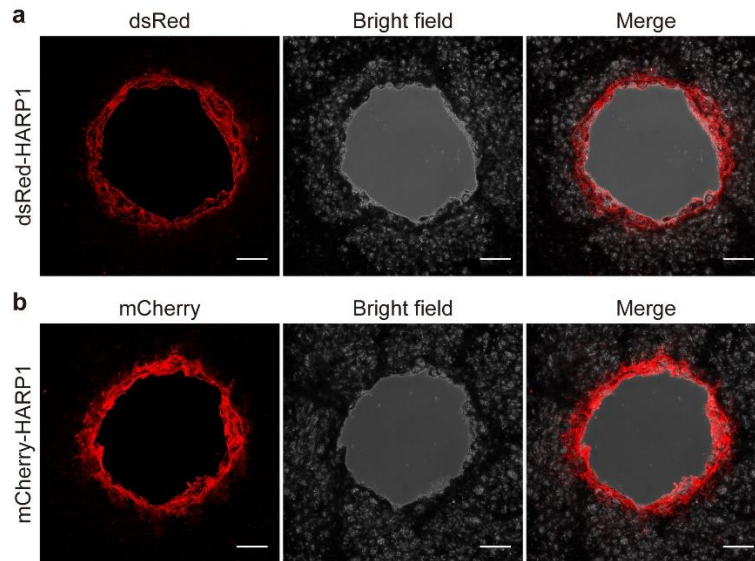

123

124 **Supplementary Figure 13. Imports of dsRed-HARP1 and mCherry-HARP1 into**  
125 ***Arabidopsis* leaf tissues.** The wounded *Arabidopsis* leaves were incubated with  
126 dsRed-HARP1 (a) or mCherry-HARP1 (b), respectively and observed under  
127 fluorescence microscope. Scale bar, 200  $\mu\text{m}$ .

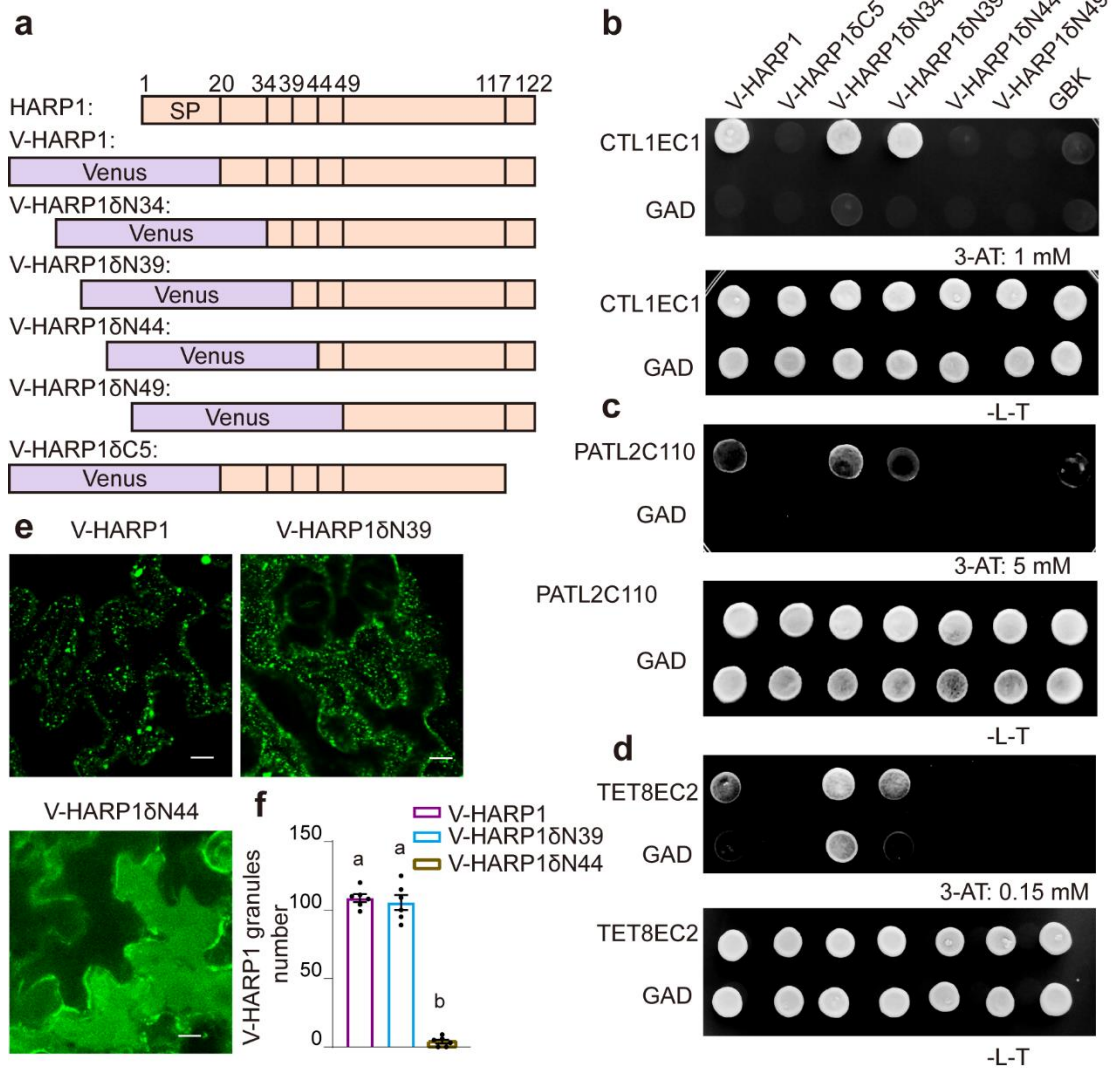

129

130 **Supplementary Figure 14. The interactions of truncated V-HARP1 with**  
 131 **CTL1EC1, PATL2C110 and TET8EC2. (a)** Schematic diagram of truncated V-  
 132 HARP1. **(b-d)** Yeast two-hybrid assay to examine the interactions of full length and  
 133 truncated V-HARP1 with CTL1EC1 **(b)**, PATL2C110 **(c)** and TET8EC2 **(d)**. V-  
 134 HARP1 and its indicated truncated forms were fused to GAL4 DNA-binding domain  
 135 (BD), CTL1EC1, PATL2C110 and TET8EC2 were fused to GAL4 activation domain  
 136 (AD), respectively. Yeast cells were examined as described in Supplementary Figure  
 137 12. **(e)** Confocal image of V-HARP1, V-HARP1 $\Delta$ N39 and HARP1 $\Delta$ N44 which were  
 138 delivered into Arabidopsis leaves by injection. Scale bar, 5  $\mu$ m. **(f)** Quantification of  
 139 the V-HARP1 granules number in **(e)**. 6 random sights were selected to count the

140 granule numbers of V-HARP1 (purple indicated), V-HARP1 $\delta$ N39 (blue indicated)  
141 and HARP1 $\delta$ N44 (brown indicated). Data are means  $\pm$  SEM ( $n$  =6 biological  
142 replicates) and analyzed by one-way ANOVA with two-sided Dunnett's post hoc test.  
143 Different letters indicate significant differences ( $P < 0.05$ ). Source data are provided  
144 as a Source Data file.



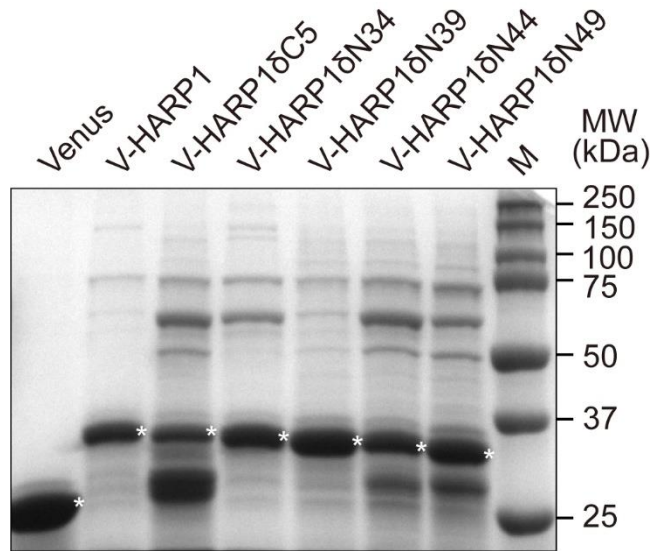

145

146 **Supplementary Figure 15.** Coomassie blue staining of Venus and indicated  
 147 truncated V-HARP1s mentioned in Fig. 4f. The procaryotically expressed proteins  
 148 were purified and subjected to SDS agarose gel electrophoresis. \* Stands for the target  
 149 band of the indicated protein.

150

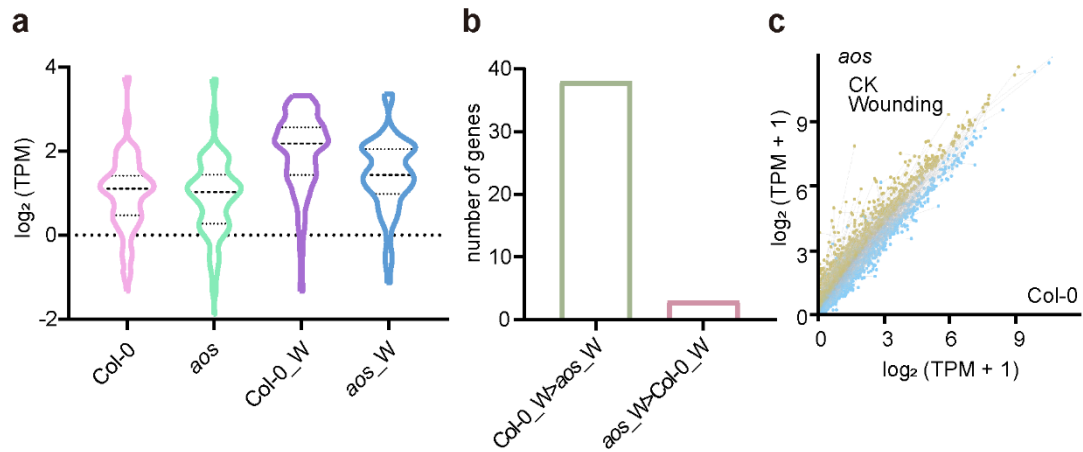

151

152 **Supplementary Figure 16. Transcriptomic analysis of gene expressions in Col-0**  
153 **and aos. (a)** Expression of 92 genes annotated as response to JA which were detected  
154 in our transcriptome data (Supplementary Data file2). CK stands for untreated plants  
155 and W stands for plants two hours post wounding. **(b)** The expressions of most of  
156 genes as described in **(a)** were higher in Col-0 than in *aos* after wounding. **(c)** Scatter  
157 plot analysis of the 1121 genes with higher expression in *aos* than in Col-0 after  
158 wounding ( $aos\_W / Col-0\_W > 2$ , FDR < 0.05).

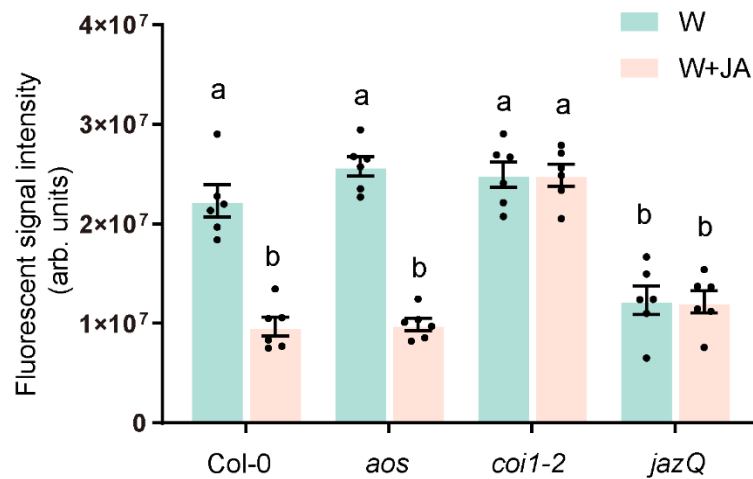

160

161 **Supplementary Figure 17. Quantification of V-HARP1 signals in Fig. 6a.** The  
 162 fluorescent signal intensity (in arbitrary units, arb. units) of V-HARP1 in leaves of  
 163 Col-0, *aos*, *coi1-2* and *jazQ* were measured. Light blue and light pink box indicate  
 164 Ethanol (W) or 50 μM MeJA (W+JA) treatment, respectively. Data are means ± SEM  
 165 ( $n = 6$  biological replicates) and analyzed by two-way ANOVA followed by multiple  
 166 comparisons with Fisher's LSD test. Different letters indicate significant differences  
 167 ( $P < 0.05$ ). Source data are provided as a Source Data file.

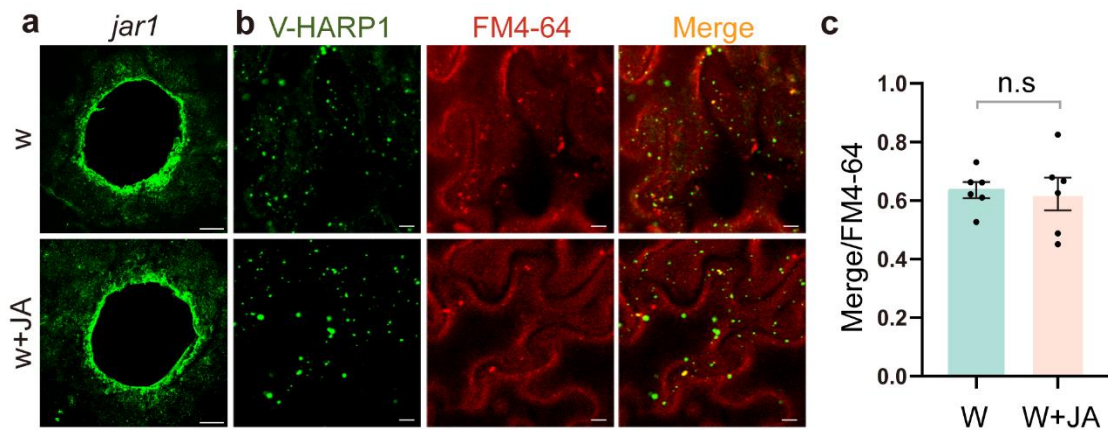

168

169 **Supplementary Figure 18. JA has no detectible impacts on HARP1 import into**  
 170 ***jar1*.** (a) Confocal image of the V-HARP1 signals around the wounding sites of the  
 171 *jar1* leaves. Leaves of *jar1* were pretreated with Ethanol (W) or 50 μM MeJA  
 172 (W+JA) for two hours and subsequently incubated with V-HARP1. Scale bar: 200  
 173 μm. (b) V-HARP1-loaded endosomes in the plants. Plants were treated as described  
 174 in (a). The internalized endosomes were traced by FM4-64. Scale bar: 5 μm. (c)  
 175 Quantification of endosomes from (b). 6 random sights were selected to count the  
 176 number of endosomes. Data are means ± SEM ( $n = 6$  biological replicates) and  
 177 analyzed by two-way ANOVA followed by multiple comparisons with Fisher's LSD  
 178 test (n.s: no significance). Source data are provided as a Source Data file.

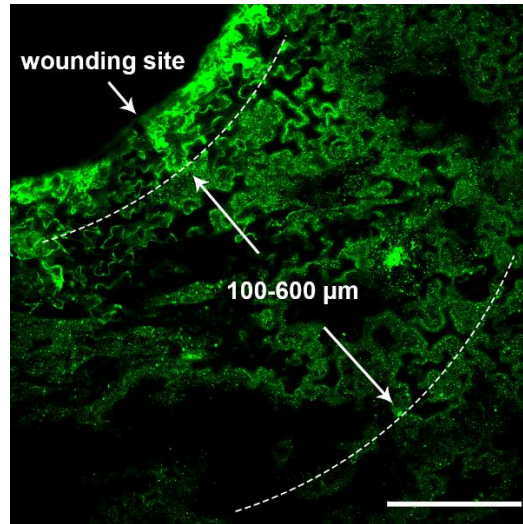

179

180 **Supplementary Figure 19. Regions used for observing the subcellular**  
181 **localization and movement of HARP1.** The wounded *Arabidopsis* leaves were  
182 incubated with V-HARP1 for four hours. Samples were washed with PBS containing  
183 0.08% BSA for at least 5 times (20 minutes for each time) and then were detected  
184 under confocal microscopy. The dotted lines indicated the area where the subcellular  
185 localization and movement of HARP1 were observed. Scale bar, 200  $\mu\text{m}$ .

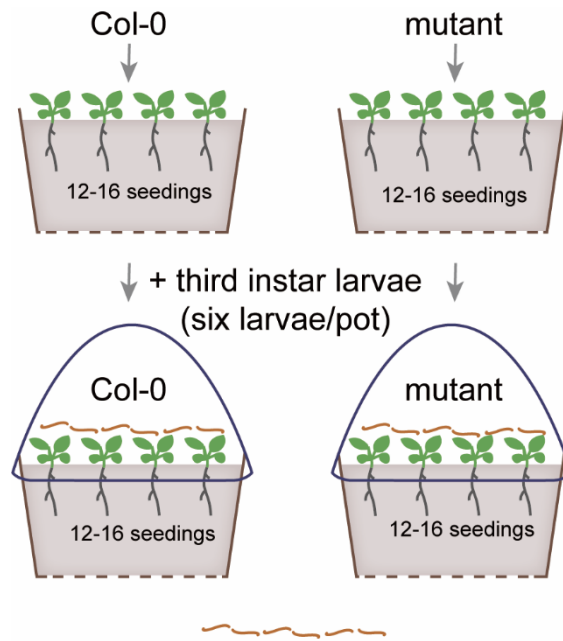

larvae were weighted individually

186

187 **Supplementary Figure 20. Diagram of cotton bollworm feeding test.** About 12-16

188 seedlings of *Arabidopsis* were planted in one pot. 5-6 pots of three-week-old plants of

189 wild type (Col-0), *tet8*, *ct11*, and *pat12* were used for insect feeding test. About 5-6 3<sup>rd</sup>

190 instar larvae were put into one pot and covered with a plastic cover. After feeding for

191 3-4 days, larvae were weighted individually.
