# Supplementary material for: Endocytosis-mediated entry of a caterpillar effector into plants is countered by Jasmonate
Source: PubMed Central journal article supplement (PMC10582130; doi:10.1038/s41467-023-42226-1), 2023-10-17
Supplement: 41467_2023_42226_MOESM4_ESM.pdf [file 41467_2023_42226_MOESM4_ESM.pdf]

## Description of Additional Supplementary Files

**Supplementary Data 1. Primers used in this investigation.**

**Supplementary Data 2.** RNA-seq analysis of wild type (Col-0) and aos without and with wounding treatment.

**Supplementary Movie 1.** V-HARP1 is moving. The wounded Arabidopsis leaves were incubated with V-HARP1. Time-lapse sequences were captured to trace the movement of V-HARP1. And the trails of the selected moving granules were marked. Scale bar, 20  $\mu\text{m}$ . Time is shown at the bottom left.

**Supplementary Movie 2-3.** Movements of V-HARP1-loaded endosomes in plant. The wounded Arabidopsis leaves were incubated with V-HARP1. Time-lapse sequences were captured to trace the movements of V-HARP1 in plant cells. FM4-64 (Red) was used to trace internalized endosomes. Scale bar, 5  $\mu\text{m}$ . Time is shown at the bottom left.
